# Supplementary material
Source: HighWire-hosted journal article supplement (https://bibliotheek.ehb.be:2666/highwire/filestream/163550/field_highwire_adjunct_files/2/bmjqs-2023-016615supp003_data_supplement.pdf)
Supplement: bmjqs-2023-016615supp003_data_supplement.pdf [file bmjqs-2023-016615supp003_data_supplement.pdf]

## Supplementary File 3: MEDIATE CMOC Coding Framework

| Overarching Conceptual Theme     | Parent Node                 | Child Node                                                                              | Notes for researchers                                                                                                          |
|----------------------------------|-----------------------------|-----------------------------------------------------------------------------------------|--------------------------------------------------------------------------------------------------------------------------------|
| Decision Making                  | Coercion:                   |                                                                                         | Pressure to follow advice against own wishes/may include threat of Mental Health Act                                           |
|                                  | Independent decision-making |                                                                                         |                                                                                                                                |
|                                  |                             | By provider                                                                             | often when the provider deems the client incapable of making rational decisions                                                |
|                                  |                             | By client                                                                               | includes autonomy, control, empowerment over own decisions                                                                     |
|                                  | Shared decision-making:     |                                                                                         | evidence and options are discussed between client and provider-client's input is equally valued and considered by the provider |
|                                  | Decisional factors-         |                                                                                         | often manifest during conflict/dilemma, new decision or change in condition                                                    |
|                                  |                             | Available information:                                                                  | includes insufficient or sufficient info or access to info                                                                     |
|                                  |                             | Family, peer roles/accountabilities                                                     | may be positive or negative                                                                                                    |
|                                  |                             | Cultural and social influences                                                          |                                                                                                                                |
|                                  |                             | Stigma                                                                                  | stigma against SMI                                                                                                             |
| Other contextual considerations, |                             | such as time and space for consultations, team-based care/inter-disciplinary approaches |                                                                                                                                |

|                              |                                      |                                                           |                                                                                                                                                            |
|------------------------------|--------------------------------------|-----------------------------------------------------------|------------------------------------------------------------------------------------------------------------------------------------------------------------|
|                              |                                      | Client insight or personal awareness-user/capacity/unwell |                                                                                                                                                            |
| <u>Therapeutic Alliance</u>  | relational factors                   | Patient approaches and perceptions                        | motivational interviewing, informed consent                                                                                                                |
|                              |                                      | Provider approaches and perceptions                       |                                                                                                                                                            |
|                              |                                      | Strategies/interventions:                                 |                                                                                                                                                            |
|                              |                                      |                                                           |                                                                                                                                                            |
| Med Management Interventions | Positive experiences and outcomes    |                                                           |                                                                                                                                                            |
|                              | Negative experiences and outcomes    |                                                           |                                                                                                                                                            |
|                              | Orals (+/- experiences)              |                                                           | Types of medications                                                                                                                                       |
|                              | Injectables [LAIs] (+/- experiences) |                                                           |                                                                                                                                                            |
|                              | Theories                             |                                                           | E.g., Example: Common sense or self-regulation theory in Pinfold<br>Stages of SDM and their barriers in Grunwald & Thompson<br>Personal identity formation |
|                              | Background Information               |                                                           | with conceptual/operational definitions of key terms and stats                                                                                             |

Deleted: Therapeutic alliance/encounter/relationship-
